# Supplementary material
Source: publisher site journal article supplement (https://www.spandidos-publications.com/107/downloadSupplementary)

Figure S1. Histopathologic changes of the pancreas and liver, in the control rats. The pancreas (A) and liver (B) tissues were collected at 3, 6, and 12 h in the SOG and SOG+BDG groups. HE staining was used to observe the histopathologic changes. Magnification, x200. BDG, bile drainage group; SOG, sham operation group.

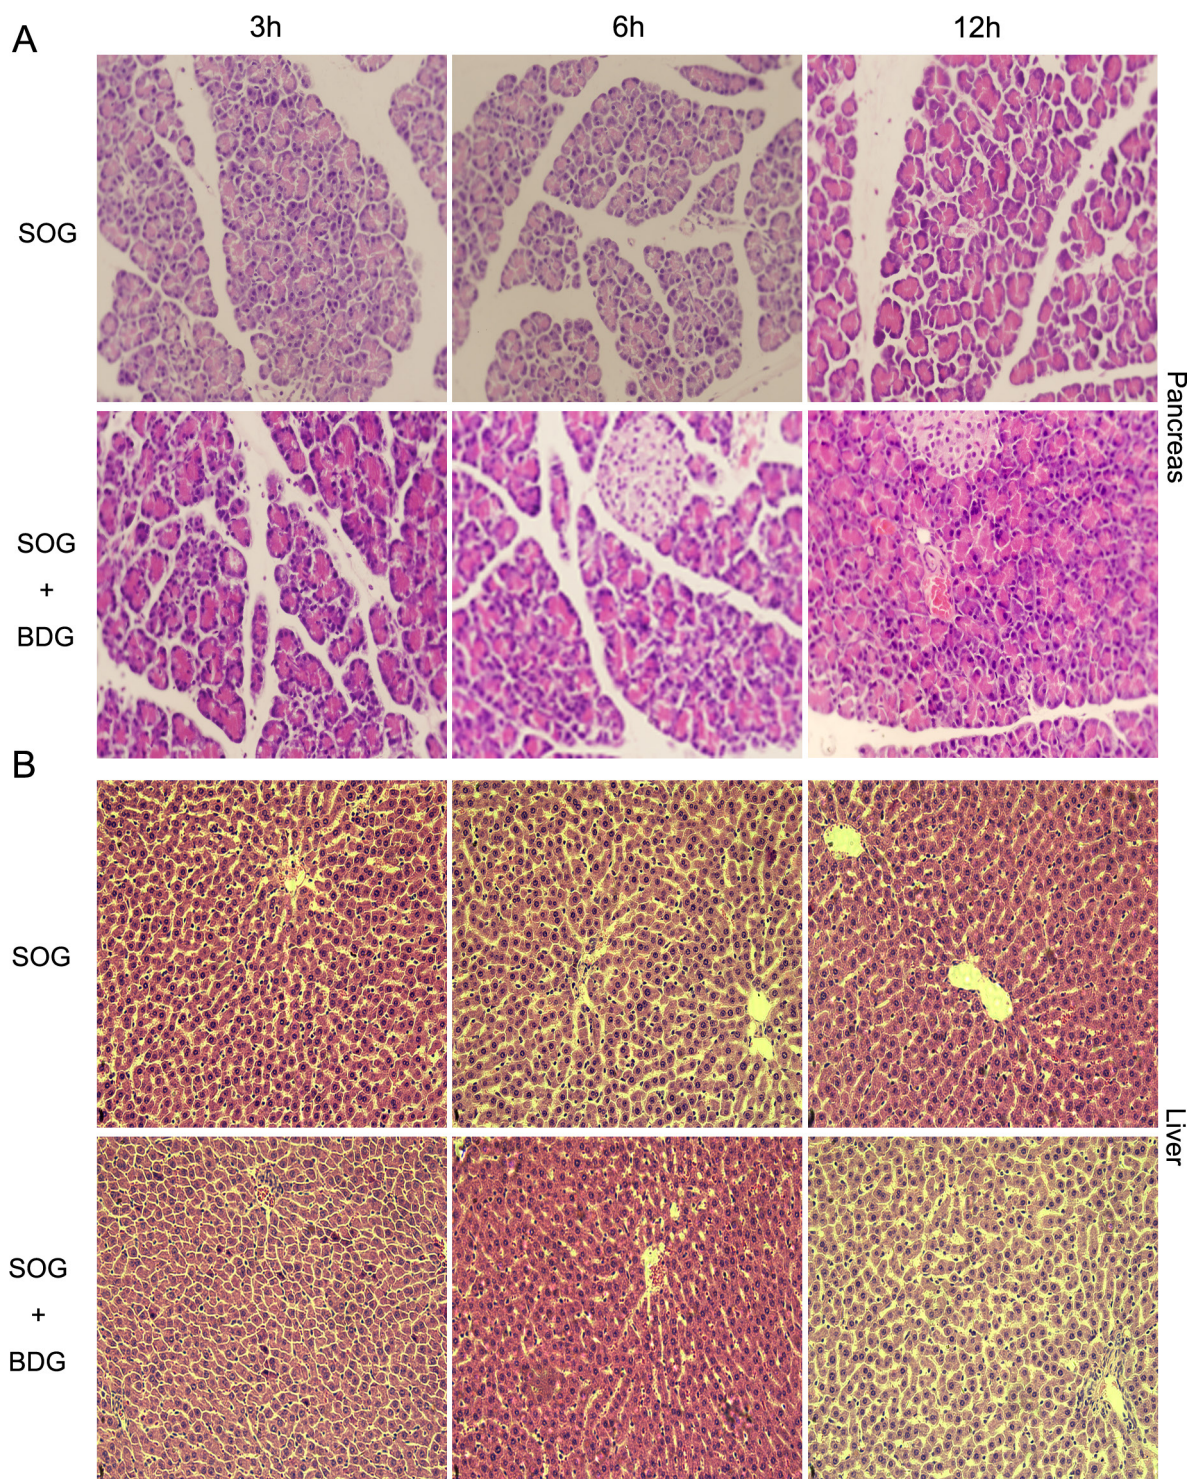

Supplement: Supplementary file 1 [file downloadSupplementary]
